# Supplementary material for: Trimethylamine‐N‐Oxide Induces Vascular Inflammation by Activating the NLRP3 Inflammasome Through the SIRT3‐SOD2‐mtROS Signaling Pathway
Source: PubMed Central journal article supplement — J Am Heart Assoc. 2017 Sep 4;6(9):e006347. doi: 10.1161/JAHA.117.006347 (PMC5634285; doi:10.1161/jaha.117.006347), 2017-09-04
Supplement: JAH3-6-e006347-s001.pdf [file JAH3-6-e006347-s001.pdf]

# **SUPPLEMENTAL MATERIAL**

1 **Supporting Information For:**  
2 **Trimethylamine-N-oxide induces vascular inflammation by**  
3 **activating the NLRP3 inflammasome through the**  
4 **SIRT3-SOD2-mtROS signaling pathway**

5  
6 **Ming-liang Chen PhD<sup>1,2</sup>, Xiao-hui Zhu PhD<sup>1</sup>, Li Ran MPH<sup>1</sup>, He-dong Lang**  
7 **MPH<sup>1</sup>, Long Yi PhD<sup>1</sup>, Man-tian Mi PhD<sup>1#</sup>**

8  
9 <sup>1</sup>Research Center for Nutrition and Food Safety, Institute of Military Preventive  
10 Medicine, Third Military Medical University, Chongqing 400038, P. R.China

11 <sup>2</sup>Institute of Toxicology, Institute of Military Preventive Medicine, Third Military  
12 Medical University, Chongqing 400038, P. R.China

13 <sup>#</sup>*Corresponding author:* Man-tian Mi.

14 Research Center for Nutrition and Food Safety, Institute of Military Preventive  
15 Medicine, Third Military Medical University, 30<sup>th</sup> Gaotanyan Main Street, Shapingba  
16 District, Chongqing 400038, P. R. China;

17 Telephone: +86 2368772305; Fax number: +86 2368772305;

18 E-mail: mantianmi2012@163.com.

**Fig. S1**

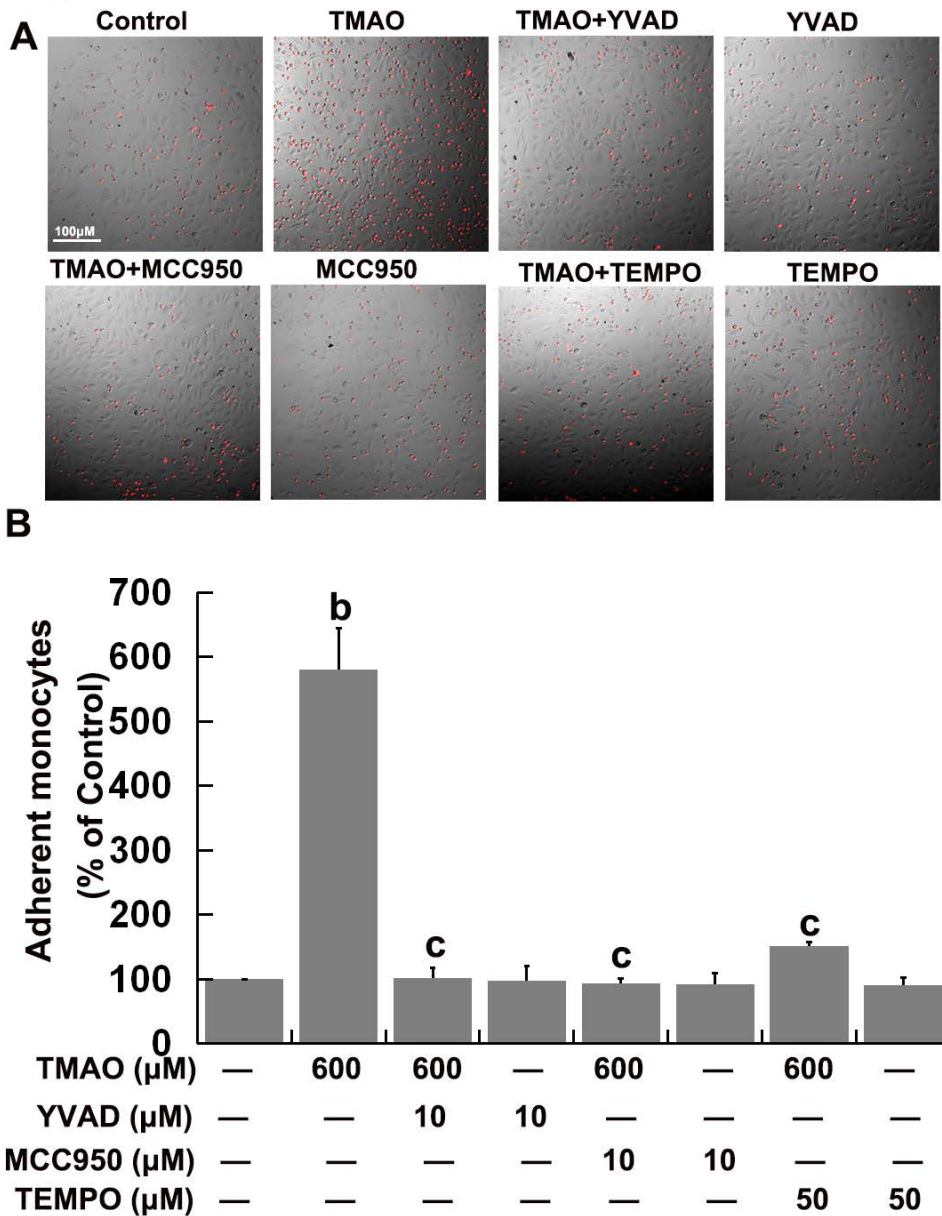

19

20 **Figure S1. The effect of trimethylamine-N-oxide (TMAO) on the adhesion of**

21 **monocytes to endothelial cells. (A)** Human umbilical vein endothelial cells

22 (HUVECs) were pretreated with YVAD (10 µM), MCC950 (10 µM) or TEMPO (50

23 µM) for 2 h followed by the addition of TMAO (600 µM) for a further 24 h.

24 Monocyte adhesion to endothelial cells was measured using fluorescently labeled

25 monocytic THP-1 cells as described in the Materials and methods section. **(B)**

26 Quantification of adhered monocytes of panel A. Values are expressed as means  $\pm$  SE  
27 (n = 3); <sup>b</sup> $p < 0.01$  versus the vehicle-treated control group; <sup>c</sup> $p < 0.01$  versus  
28 TMAO-treated group; AU indicates arbitrary units.
